# Supplementary material for: Genome-wide association study of depression phenotypes in UK Biobank identifies variants in excitatory synaptic pathways
Source: PubMed Central journal article supplement (PMC5902628; doi:10.1038/s41467-018-03819-3), 2018-04-16
Supplement: 41467_2018_3819_MOESM3_ESM.pdf [file 41467_2018_3819_MOESM3_ESM.pdf]

## Description of Additional Supplementary Files

File Name: Supplementary Data 1

Description: Independent variants with a genome-wide significant ( $P < 5 \times 10^{-8}$ ) association with either broad depression, probable major depressive disorder (MDD), or International Classification of Diseases-coded MDD in UK Biobank. Effect size (beta), standard error and p-values are the results from the linear model across the three phenotypes examined. Odds Ratios are calculated using a logistic regression model. Cells surrounded by a border indicate the phenotype for which statistical significance was initially observed.

File Name: Supplementary Data 2

Description: Variants with a P-value  $< 1 \times 10^{-6}$  for an association with broad depression.

File Name: Supplementary Data 3

Description: Variants with a P-value  $< 1 \times 10^{-6}$  for an association with probable MDD

File Name: Supplementary Data 4

Description: Variants with a P-value  $< 1 \times 10^{-6}$  for an association with ICD-coded MDD

File Name: Supplementary Data 5

Description: Genetic correlations (rg) between the three depression-related phenotypes and 235 other behavioural and disease related traits, sorted by significance with broad depression.

File Name: Supplementary Data 6

Description: Genome-wide significant gene-based hits ( $P < 2.77 \times 10^{-6}$ ) in the MAGMA gene-based analysis for broad depression. NSNPS is the number of SNPs in the gene; NiSNPs is the number of independent SNPs in the gene.

File Name: Supplementary Data 7

Description: Genome-wide significant gene-based hits ( $P < 2.77 \times 10^{-6}$ ) in the MAGMA gene-based analysis for probable MDD. NSNPS is the number of SNPs in the gene; NiSNPs is the number of independent SNPs in the gene.

File Name: Supplementary Data 8

Description: Genome-wide significant gene-based hits ( $P < 2.77 \times 10^{-6}$ ) in the MAGMA gene-based analysis for ICD-coded MDD. NSNPS is the number of SNPs in the gene; NiSNPs is the number of independent SNPs in the gene.

File Name: Supplementary Data 9

Description: Genome-wide significant region-based hits ( $P < 6.02 \times 10^{-6}$ ) in the MAGMA region-based analysis for broad depression. NSNPS is the number of SNPs in the gene; NiSNPs is the number of independent SNPs in the gene. RegNum is the region number by clustering nearby significant blocks by at less than 100K bp distance together as a region.

File Name: Supplementary Data 10

Description: Genome-wide significant region-based hits ( $P < 6.02 \times 10^{-6}$ ) in the MAGMA region-based analysis for probable MDD. NSNPS is the number of SNPs in the gene; NiSNPs is the number of independent SNPs in the gene. RegNum is the region number by clustering nearby significant blocks by at less than 100K bp distance together as a region.

File Name: Supplementary Data 11

Description: Genome-wide significant region-based hits ( $P < 6.02 \times 10^{-6}$ ) in the MAGMA region-based analysis for ICD-coded MDD . NSNPS is the number of SNPs in the gene; NiSNPs is the number of independent SNPs in the gene. RegNum is the region number by clustering nearby significant blocks by at less than 100K bp distance together as a region.

File Name: Supplementary Data 12

Description: Genes located within the five significant gene-sets identified for broad depression. P-values are those obtained from MAGMA for each genes association with broad depression along with an indication of significance

File Name: Supplementary Data 13

Description: Enrichment across 209 tissues for each phenotype using DEPICT.

File Name: Supplementary Data 14

Description: Expression quantitative trait loci identified by analysis of significant variants using the GTEx online portal and the significance of their expression in the specified tissues.
